# Supplementary material
Source: publisher figshare collection journal article supplement (https://acs.figshare.com/ndownloader/files/4475773)
Supplement: Supplementary file 1 [file 4475773]

data_General
_audit_creation_date                  '2009-04-17'
_audit_creation_method                'by CrystalStructure 3.8'
_audit_update_record                   ?

#==============================================================================

# PROCESSING SUMMARY (IUCr Office Use Only)

_journal_date_recd_electronic     ?
_journal_date_from_coeditor       ?
_journal_date_accepted            ?
_journal_coeditor_code            ?

#==============================================================================

# SUBMISSION DETAILS

_publ_contact_author_name             'Keiji Maruoka'
_publ_contact_author_email            'maruoka@kuchem.kyoto-u.ac.jp'
_publ_contact_author_fax              '+81(75)-753-4041'
_publ_contact_author_phone            '+81(75)-753-4041'
_publ_contact_letter
;
    ENTER TEXT OF LETTER
;
_publ_requested_journal               'ENTER JOURNAL NAME HERE'
_publ_requested_category              'CHOOSE FI FM FO CI CM CO or AD'
_publ_requested_coeditor_name          ?

#==============================================================================

# TITLE AND AUTHOR LIST

_publ_section_title
;
    ENTER SECTION TITLE
;
_publ_section_title_footnote
;
    ENTER FOOTNOTE TO TITLE OF PAPER
;
loop_
_publ_author_name
_publ_author_footnote
_publ_author_address
' FIRST AUTHORS NAME '
;
  FIRST AUTHORS FOOTNOTES
;
;
  FIRST AUTHORS ADDRESS
;
_publ_section_synopsis
;
  ENTER SYNOPSIS
;

#==============================================================================

# TEXT

_publ_section_abstract
;
    ENTER ABSTRACT
;
_publ_section_comment
;
    ENTER TEXT
;
_publ_section_references
;
    ENTER OTHER REFERENCES

    Rigaku Americas and Rigaku Corporation. (2007).
    CrystalStructure (Version 3.8). 
    Single Crystal Structure Analysis Software.
    Rigaku Americas, 9009 TX, USA 77381-5209.
    Rigaku, Tokyo 196-8666, Japan.

    Altomare, A., Burla, M., Camalli, M., Cascarano, G., 
    Giacovazzo, C., Guagliardi, A., Moliterni, A., Polidori, 
    G., and Spagna, R. (1999). J. Appl. Cryst., 32, 115-119. 
    SIR97

    Sheldrick, G.M. (1997). SHELXL97. University of Gottingen, Germany.

;
_publ_section_figure_captions
;
    ENTER FIGURE CAPTIONS
;
_publ_section_exptl_prep
;
    ENTER COMPOUND PREPARATION DETAILS
;
_publ_section_exptl_refinement
;
    ENTER SPECIAL DETAILS OF THE REFINEMENT
;

#==============================================================================

data__hashimoto9417

#==============================================================================

# CHEMICAL DATA

_chemical_formula_sum                  'C18 H26 N2 O2 '
_chemical_formula_moiety               'C18 H26 N2 O2 '
_chemical_formula_weight               302.42
_chemical_melting_point                ?
_chemical_absolute_configuration       'unk'

#==============================================================================

# CRYSTAL DATA
_symmetry_cell_setting                 orthorhombic
_symmetry_space_group_name_H-M        'P 21 21 21'
_symmetry_space_group_name_Hall       'P 2ac 2ab'
_symmetry_Int_Tables_number            19
loop_
_symmetry_equiv_pos_site_id
_symmetry_equiv_pos_as_xyz
1   '+X,+Y,+Z'
2   '1/2+X,1/2-Y,-Z'
3   '-X,1/2+Y,1/2-Z'
4   '1/2-X,-Y,1/2+Z'

#------------------------------------------------------------------------------

_cell_length_a                         9.46167(17)
_cell_length_b                         11.9002(2)
_cell_length_c                         15.0505(3)
_cell_angle_alpha                      90.0000
_cell_angle_beta                       90.0000
_cell_angle_gamma                      90.0000
_cell_volume                           1694.62(5)
_cell_formula_units_Z                  4
_cell_measurement_reflns_used          15932
_cell_measurement_theta_min            3.7
_cell_measurement_theta_max            68.2
_cell_measurement_temperature          123.1

#------------------------------------------------------------------------------

_exptl_crystal_description            'block'
_exptl_crystal_colour                 'colorless'
_exptl_crystal_size_max                0.60
_exptl_crystal_size_mid                0.30
_exptl_crystal_size_min                0.20
_exptl_crystal_density_diffrn          1.185
_exptl_crystal_density_meas            ?
_exptl_crystal_density_method         'not measured'
_exptl_crystal_F_000                   656.00
_exptl_absorpt_coefficient_mu          0.612
_exptl_absorpt_correction_type         multi-scan
_exptl_absorpt_process_details         
;
    Higashi, T. (1995). Program for Absorption Correction.
    Rigaku Corporation, Tokyo, Japan.
;
_exptl_absorpt_correction_T_min        0.779
_exptl_absorpt_correction_T_max        0.885

#==============================================================================

# EXPERIMENTAL DATA

_diffrn_radiation_type                'Cu K\a'
_diffrn_radiation_wavelength           1.54187
_diffrn_measurement_device_type       'Rigaku RAXIS-RAPID'
_diffrn_measurement_method             \w
_diffrn_detector_area_resol_mean       5.00
_diffrn_reflns_number                  17781
_diffrn_reflns_av_R_equivalents        0.043
_diffrn_reflns_theta_max               68.20
_diffrn_measured_fraction_theta_max    0.999
_diffrn_reflns_theta_full              68.20
_diffrn_measured_fraction_theta_full   0.999
_diffrn_reflns_limit_h_min             -11
_diffrn_reflns_limit_h_max             11
_diffrn_reflns_limit_k_min             -14
_diffrn_reflns_limit_k_max             14
_diffrn_reflns_limit_l_min             -18
_diffrn_reflns_limit_l_max             18

#==============================================================================

# REFINEMENT DATA

_refine_special_details
;
    Refinement was performed using all reflections. The weighted 
    R-factor (wR) and goodness of fit (S) are based on F^2^.
    R-factor (gt) are based on F. The threshold expression of
    F^2^ > 2.0 sigma(F^2^) is used only for calculating R-factor (gt).
;
_reflns_number_total                   3091
_reflns_number_gt                      2825
_reflns_threshold_expression           F^2^>2.0\s(F^2^)
_refine_ls_structure_factor_coef       Fsqd
_refine_ls_R_factor_gt                 0.0334
_refine_ls_wR_factor_ref               0.0877
_refine_ls_hydrogen_treatment          refall
_refine_ls_number_reflns               3091
_refine_ls_number_parameters           200
_refine_ls_goodness_of_fit_ref         1.077
_refine_ls_weighting_scheme            calc
_refine_ls_weighting_details
   'w = 1/[\s^2^(Fo^2^)+(0.0433P)^2^+0.2309P] where P=(Fo^2^+2Fc^2^)/3'
_refine_ls_shift/su_max                0.0000
_refine_diff_density_max               0.12
_refine_diff_density_min               -0.20
_refine_ls_extinction_method           none
_refine_ls_extinction_coef             ?
_refine_ls_abs_structure_details
   'Flack, H. D. (1983), Acta Cryst. A39, 876-881.  1304 Friedel Pairs'
_refine_ls_abs_structure_Flack         0.1(2)

loop_
_atom_type_symbol
_atom_type_description
_atom_type_scat_dispersion_real
_atom_type_scat_dispersion_imag
_atom_type_scat_source
  'C' 'C'  0.018 0.009 
;
International Tables for Crystallography
(1992, Vol. C, Tables 4.2.6.8 and 6.1.1.4)
;
  'H' 'H'  0.000 0.000 
;
International Tables for Crystallography
(1992, Vol. C, Table 6.1.1.4)
;
  'O' 'O'  0.049 0.032 
;
International Tables for Crystallography
(1992, Vol. C, Tables 4.2.6.8 and 6.1.1.4)
;
  'N' 'N'  0.031 0.018 
;
International Tables for Crystallography
(1992, Vol. C, Tables 4.2.6.8 and 6.1.1.4)
;

#==============================================================================

# ATOMIC COORDINATES AND THERMAL PARAMETERS

loop_
_atom_site_label
_atom_site_type_symbol
_atom_site_fract_x
_atom_site_fract_y
_atom_site_fract_z
_atom_site_U_iso_or_equiv
_atom_site_adp_type
_atom_site_occupancy
_atom_site_symmetry_multiplicity
_atom_site_calc_flag
_atom_site_refinement_flags
_atom_site_disorder_assembly
_atom_site_disorder_group
 O(1) O 0.43553(13) 0.07916(11) 0.00035(8) 0.0407(3) Uani 1.00 1 d . . .
 O(2) O 0.64594(15) 0.46204(12) 0.00970(9) 0.0501(3) Uani 1.00 1 d . . .
 N(1) N 0.56490(14) 0.16773(11) 0.10379(8) 0.0272(3) Uani 1.00 1 d . . .
 N(2) N 0.68139(13) 0.17083(11) 0.16361(8) 0.0251(2) Uani 1.00 1 d . . .
 C(1) C 0.63213(16) -0.02207(13) 0.05843(10) 0.0267(3) Uani 1.00 1 d . . .
 C(2) C 0.53815(16) 0.07878(14) 0.05154(10) 0.0276(3) Uani 1.00 1 d . . .
 C(3) C 0.63161(18) 0.13879(15) 0.25294(11) 0.0347(4) Uani 1.00 1 d . . .
 C(4) C 0.59049(17) 0.35766(13) 0.14749(11) 0.0307(3) Uani 1.00 1 d . . .
 C(5) C 0.49038(16) 0.27711(14) 0.09729(12) 0.0317(3) Uani 1.00 1 d . . .
 C(6) C 0.8583(2) -0.11421(16) 0.06401(11) 0.0398(4) Uani 1.00 1 d . . .
 C(7) C 0.77936(17) -0.01685(14) 0.05953(10) 0.0302(3) Uani 1.00 1 d . . .
 C(8) C 0.59981(19) 0.47043(15) 0.09859(13) 0.0397(4) Uani 1.00 1 d . . .
 C(9) C 0.56713(19) -0.12691(14) 0.05998(11) 0.0362(4) Uani 1.00 1 d . . .
 C(10) C 0.72935(16) 0.28981(13) 0.15480(11) 0.0259(3) Uani 1.00 1 d . . .
 C(11) C 0.84197(17) 0.31768(14) 0.22606(10) 0.0308(3) Uani 1.00 1 d . . .
 C(12) C 0.6463(2) -0.22412(16) 0.06612(12) 0.0456(4) Uani 1.00 1 d . . .
 C(13) C 0.7943(2) 0.27768(17) 0.31839(11) 0.0406(4) Uani 1.00 1 d . . .
 C(14) C 0.8730(2) 0.44376(16) 0.23027(13) 0.0449(4) Uani 1.00 1 d . . .
 C(15) C 0.7913(2) -0.21781(17) 0.06902(12) 0.0457(4) Uani 1.00 1 d . . .
 C(16) C 0.97979(17) 0.25734(17) 0.19906(12) 0.0404(4) Uani 1.00 1 d . . .
 C(17) C 0.75009(19) 0.15480(16) 0.31921(11) 0.0395(4) Uani 1.00 1 d . . .
 C(18) C 0.33991(19) 0.27495(18) 0.13350(15) 0.0469(4) Uani 1.00 1 d . . .
 H(1) H 0.6010 0.0592 0.2528 0.042 Uiso 1.00 1 c R . .
 H(2) H 0.5497 0.1859 0.2699 0.042 Uiso 1.00 1 c R . .
 H(3) H 0.5522 0.3709 0.2085 0.037 Uiso 1.00 1 c R . .
 H(4) H 0.4871 0.3002 0.0334 0.038 Uiso 1.00 1 c R . .
 H(5) H 0.9585 -0.1103 0.0637 0.048 Uiso 1.00 1 c R . .
 H(6) H 0.8255 0.0540 0.0572 0.036 Uiso 1.00 1 c R . .
 H(7) H 0.5054 0.5063 0.0993 0.048 Uiso 1.00 1 c R . .
 H(8) H 0.6655 0.5202 0.1314 0.048 Uiso 1.00 1 c R . .
 H(9) H 0.4670 -0.1317 0.0568 0.043 Uiso 1.00 1 c R . .
 H(10) H 0.7775 0.2959 0.0958 0.031 Uiso 1.00 1 c R . .
 H(11) H 0.6007 -0.2952 0.0683 0.055 Uiso 1.00 1 c R . .
 H(12) H 0.8726 0.2886 0.3611 0.049 Uiso 1.00 1 c R . .
 H(13) H 0.7137 0.3244 0.3383 0.049 Uiso 1.00 1 c R . .
 H(14) H 0.7870 0.4843 0.2473 0.054 Uiso 1.00 1 c R . .
 H(15) H 0.9048 0.4699 0.1718 0.054 Uiso 1.00 1 c R . .
 H(16) H 0.9472 0.4578 0.2743 0.054 Uiso 1.00 1 c R . .
 H(17) H 0.8458 -0.2845 0.0745 0.055 Uiso 1.00 1 c R . .
 H(18) H 0.9629 0.1762 0.1959 0.048 Uiso 1.00 1 c R . .
 H(19) H 1.0533 0.2727 0.2433 0.048 Uiso 1.00 1 c R . .
 H(20) H 1.0108 0.2848 0.1408 0.048 Uiso 1.00 1 c R . .
 H(21) H 0.8314 0.1066 0.3031 0.047 Uiso 1.00 1 c R . .
 H(22) H 0.7177 0.1333 0.3794 0.047 Uiso 1.00 1 c R . .
 H(23) H 0.2828 0.2224 0.0985 0.056 Uiso 1.00 1 c R . .
 H(24) H 0.2988 0.3504 0.1296 0.056 Uiso 1.00 1 c R . .
 H(25) H 0.3414 0.2507 0.1957 0.056 Uiso 1.00 1 c R . .
 H(26) H 0.7271 0.4335 0.0084 0.060 Uiso 1.00 1 c R . .


loop_
_atom_site_aniso_label
_atom_site_aniso_U_11
_atom_site_aniso_U_22
_atom_site_aniso_U_33
_atom_site_aniso_U_12
_atom_site_aniso_U_13
_atom_site_aniso_U_23
 O(1) 0.0295(6) 0.0491(7) 0.0435(6) -0.0011(5) -0.0150(5) -0.0015(5)
 O(2) 0.0375(6) 0.0567(8) 0.0561(8) 0.0143(6) 0.0159(6) 0.0227(6)
 N(1) 0.0220(6) 0.0272(7) 0.0324(6) 0.0020(5) -0.0050(5) 0.0027(5)
 N(2) 0.0239(6) 0.0271(6) 0.0244(6) -0.0035(5) -0.0036(5) 0.0014(5)
 C(1) 0.0293(7) 0.0292(8) 0.0217(7) -0.0032(6) -0.0017(6) 0.0013(6)
 C(2) 0.0220(7) 0.0326(8) 0.0280(7) -0.0032(6) -0.0019(6) 0.0022(6)
 C(3) 0.0365(9) 0.0384(10) 0.0291(8) -0.0102(8) 0.0020(7) 0.0066(7)
 C(4) 0.0268(7) 0.0299(9) 0.0355(8) 0.0027(7) 0.0065(6) -0.0008(7)
 C(5) 0.0250(8) 0.0287(8) 0.0413(9) 0.0055(7) 0.0011(7) 0.0049(7)
 C(6) 0.0377(9) 0.0475(11) 0.0342(9) 0.0113(8) -0.0063(8) -0.0055(8)
 C(7) 0.0289(7) 0.0333(9) 0.0284(8) -0.0010(7) -0.0042(7) -0.0020(7)
 C(8) 0.0351(9) 0.0315(9) 0.0526(10) 0.0075(7) 0.0094(8) 0.0074(8)
 C(9) 0.0393(9) 0.0340(9) 0.0353(8) -0.0109(7) 0.0010(8) -0.0006(7)
 C(10) 0.0251(7) 0.0242(7) 0.0285(7) -0.0006(6) 0.0047(6) -0.0003(6)
 C(11) 0.0288(8) 0.0329(9) 0.0306(8) -0.0069(7) -0.0008(6) -0.0026(6)
 C(12) 0.0691(13) 0.0270(9) 0.0408(9) -0.0073(9) 0.0051(9) 0.0017(7)
 C(13) 0.0413(9) 0.0520(11) 0.0284(8) -0.0124(9) -0.0000(7) -0.0032(7)
 C(14) 0.0458(11) 0.0419(10) 0.0471(10) -0.0133(9) -0.0036(8) -0.0045(8)
 C(15) 0.0649(13) 0.0357(10) 0.0365(9) 0.0171(10) -0.0012(9) 0.0027(8)
 C(16) 0.0262(8) 0.0538(12) 0.0412(10) -0.0031(8) -0.0035(7) 0.0035(8)
 C(17) 0.0472(10) 0.0448(10) 0.0264(8) -0.0136(8) -0.0033(7) 0.0074(7)
 C(18) 0.0247(8) 0.0486(11) 0.0675(13) 0.0044(8) 0.0040(8) -0.0029(9)

#==============================================================================

_computing_data_collection            'PROCESS-AUTO'
_computing_cell_refinement            'PROCESS-AUTO'
_computing_data_reduction             'CrystalStructure'
_computing_structure_solution         'SIR97'
_computing_structure_refinement       'SHELXL'
_computing_publication_material       'CrystalStructure 3.8'
_computing_molecular_graphics          ?

#==============================================================================

# MOLECULAR GEOMETRY

_geom_special_details
;
    ENTER SPECIAL DETAILS OF THE MOLECULAR GEOMETRY
;

loop_
_geom_bond_atom_site_label_1
_geom_bond_atom_site_label_2
_geom_bond_distance
_geom_bond_publ_flag
_geom_bond_site_symmetry_1
_geom_bond_site_symmetry_2
O(1) C(2) 1.2395(19) yes . .
O(2) C(8) 1.411(2) yes . .
N(1) N(2) 1.4236(17) yes . .
N(1) C(2) 1.343(2) yes . .
N(1) C(5) 1.484(2) yes . .
N(2) C(3) 1.475(2) yes . .
N(2) C(10) 1.493(2) yes . .
C(1) C(2) 1.497(2) yes . .
C(1) C(7) 1.395(2) yes . .
C(1) C(9) 1.391(2) yes . .
C(3) C(17) 1.513(2) yes . .
C(4) C(5) 1.545(2) yes . .
C(4) C(8) 1.533(2) yes . .
C(4) C(10) 1.546(2) yes . .
C(5) C(18) 1.525(2) yes . .
C(6) C(7) 1.380(2) yes . .
C(6) C(15) 1.388(2) yes . .
C(9) C(12) 1.381(2) yes . .
C(10) C(11) 1.548(2) yes . .
C(11) C(13) 1.537(2) yes . .
C(11) C(14) 1.530(2) yes . .
C(11) C(16) 1.543(2) yes . .
C(12) C(15) 1.374(3) yes . .
C(13) C(17) 1.521(2) yes . .
O(2) H(26) 0.840 no . .
C(3) H(1) 0.990 no . .
C(3) H(2) 0.990 no . .
C(4) H(3) 1.000 no . .
C(5) H(4) 1.000 no . .
C(6) H(5) 0.950 no . .
C(7) H(6) 0.950 no . .
C(8) H(7) 0.990 no . .
C(8) H(8) 0.990 no . .
C(9) H(9) 0.950 no . .
C(10) H(10) 1.000 no . .
C(12) H(11) 0.950 no . .
C(13) H(12) 0.990 no . .
C(13) H(13) 0.990 no . .
C(14) H(14) 0.980 no . .
C(14) H(15) 0.980 no . .
C(14) H(16) 0.980 no . .
C(15) H(17) 0.950 no . .
C(16) H(18) 0.980 no . .
C(16) H(19) 0.980 no . .
C(16) H(20) 0.980 no . .
C(17) H(21) 0.990 no . .
C(17) H(22) 0.990 no . .
C(18) H(23) 0.980 no . .
C(18) H(24) 0.980 no . .
C(18) H(25) 0.980 no . .

loop_
_geom_angle_atom_site_label_1
_geom_angle_atom_site_label_2
_geom_angle_atom_site_label_3
_geom_angle
_geom_angle_publ_flag
_geom_angle_site_symmetry_1
_geom_angle_site_symmetry_2
_geom_angle_site_symmetry_3
N(2) N(1) C(2) 122.46(12) yes . . .
N(2) N(1) C(5) 112.76(11) yes . . .
C(2) N(1) C(5) 124.30(13) yes . . .
N(1) N(2) C(3) 108.82(11) yes . . .
N(1) N(2) C(10) 101.76(11) yes . . .
C(3) N(2) C(10) 115.04(12) yes . . .
C(2) C(1) C(7) 123.94(14) yes . . .
C(2) C(1) C(9) 117.22(13) yes . . .
C(7) C(1) C(9) 118.77(14) yes . . .
O(1) C(2) N(1) 120.58(14) yes . . .
O(1) C(2) C(1) 120.74(14) yes . . .
N(1) C(2) C(1) 118.65(13) yes . . .
N(2) C(3) C(17) 109.38(13) yes . . .
C(5) C(4) C(8) 110.10(13) yes . . .
C(5) C(4) C(10) 103.40(12) yes . . .
C(8) C(4) C(10) 116.26(13) yes . . .
N(1) C(5) C(4) 102.75(12) yes . . .
N(1) C(5) C(18) 113.92(14) yes . . .
C(4) C(5) C(18) 114.09(14) yes . . .
C(7) C(6) C(15) 120.08(17) yes . . .
C(1) C(7) C(6) 120.24(15) yes . . .
O(2) C(8) C(4) 114.27(14) yes . . .
C(1) C(9) C(12) 120.82(16) yes . . .
N(2) C(10) C(4) 104.08(11) yes . . .
N(2) C(10) C(11) 110.55(12) yes . . .
C(4) C(10) C(11) 121.50(13) yes . . .
C(10) C(11) C(13) 110.97(13) yes . . .
C(10) C(11) C(14) 111.78(13) yes . . .
C(10) C(11) C(16) 107.43(12) yes . . .
C(13) C(11) C(14) 108.83(14) yes . . .
C(13) C(11) C(16) 110.02(14) yes . . .
C(14) C(11) C(16) 107.74(14) yes . . .
C(9) C(12) C(15) 119.85(18) yes . . .
C(11) C(13) C(17) 112.70(14) yes . . .
C(6) C(15) C(12) 120.16(18) yes . . .
C(3) C(17) C(13) 108.63(14) yes . . .
C(8) O(2) H(26) 109.5 no . . .
N(2) C(3) H(1) 109.8 no . . .
N(2) C(3) H(2) 109.8 no . . .
C(17) C(3) H(1) 109.8 no . . .
C(17) C(3) H(2) 109.8 no . . .
H(1) C(3) H(2) 108.3 no . . .
C(5) C(4) H(3) 108.9 no . . .
C(8) C(4) H(3) 108.9 no . . .
C(10) C(4) H(3) 108.9 no . . .
N(1) C(5) H(4) 108.6 no . . .
C(4) C(5) H(4) 108.6 no . . .
C(18) C(5) H(4) 108.6 no . . .
C(7) C(6) H(5) 120.0 no . . .
C(15) C(6) H(5) 120.0 no . . .
C(1) C(7) H(6) 119.9 no . . .
C(6) C(7) H(6) 119.9 no . . .
O(2) C(8) H(7) 108.7 no . . .
O(2) C(8) H(8) 108.7 no . . .
C(4) C(8) H(7) 108.7 no . . .
C(4) C(8) H(8) 108.7 no . . .
H(7) C(8) H(8) 107.6 no . . .
C(1) C(9) H(9) 119.6 no . . .
C(12) C(9) H(9) 119.6 no . . .
N(2) C(10) H(10) 106.6 no . . .
C(4) C(10) H(10) 106.6 no . . .
C(11) C(10) H(10) 106.6 no . . .
C(9) C(12) H(11) 120.1 no . . .
C(15) C(12) H(11) 120.1 no . . .
C(11) C(13) H(12) 109.0 no . . .
C(11) C(13) H(13) 109.0 no . . .
C(17) C(13) H(12) 109.1 no . . .
C(17) C(13) H(13) 109.1 no . . .
H(12) C(13) H(13) 107.8 no . . .
C(11) C(14) H(14) 109.5 no . . .
C(11) C(14) H(15) 109.5 no . . .
C(11) C(14) H(16) 109.5 no . . .
H(14) C(14) H(15) 109.5 no . . .
H(14) C(14) H(16) 109.5 no . . .
H(15) C(14) H(16) 109.5 no . . .
C(6) C(15) H(17) 119.9 no . . .
C(12) C(15) H(17) 119.9 no . . .
C(11) C(16) H(18) 109.5 no . . .
C(11) C(16) H(19) 109.5 no . . .
C(11) C(16) H(20) 109.5 no . . .
H(18) C(16) H(19) 109.5 no . . .
H(18) C(16) H(20) 109.5 no . . .
H(19) C(16) H(20) 109.5 no . . .
C(3) C(17) H(21) 110.0 no . . .
C(3) C(17) H(22) 110.0 no . . .
C(13) C(17) H(21) 110.0 no . . .
C(13) C(17) H(22) 110.0 no . . .
H(21) C(17) H(22) 108.3 no . . .
C(5) C(18) H(23) 109.5 no . . .
C(5) C(18) H(24) 109.5 no . . .
C(5) C(18) H(25) 109.5 no . . .
H(23) C(18) H(24) 109.5 no . . .
H(23) C(18) H(25) 109.5 no . . .
H(24) C(18) H(25) 109.5 no . . .

loop_
_geom_torsion_atom_site_label_1
_geom_torsion_atom_site_label_2
_geom_torsion_atom_site_label_3
_geom_torsion_atom_site_label_4
_geom_torsion
_geom_torsion_publ_flag
_geom_torsion_site_symmetry_1
_geom_torsion_site_symmetry_2
_geom_torsion_site_symmetry_3
_geom_torsion_site_symmetry_4
N(2) N(1) C(2) O(1) 179.91(13) ? . . . .
N(2) N(1) C(2) C(1) 1.8(2) ? . . . .
C(2) N(1) N(2) C(3) -96.96(16) ? . . . .
C(2) N(1) N(2) C(10) 141.19(13) ? . . . .
N(2) N(1) C(5) C(4) 10.11(16) ? . . . .
N(2) N(1) C(5) C(18) -113.82(15) ? . . . .
C(5) N(1) N(2) C(3) 90.68(14) ? . . . .
C(5) N(1) N(2) C(10) -31.17(14) ? . . . .
C(2) N(1) C(5) C(4) -162.09(14) ? . . . .
C(2) N(1) C(5) C(18) 74.0(2) ? . . . .
C(5) N(1) C(2) O(1) -8.6(2) ? . . . .
C(5) N(1) C(2) C(1) 173.23(13) ? . . . .
N(1) N(2) C(3) C(17) -173.43(13) ? . . . .
N(1) N(2) C(10) C(4) 38.90(13) ? . . . .
N(1) N(2) C(10) C(11) 170.91(11) ? . . . .
C(3) N(2) C(10) C(4) -78.54(15) ? . . . .
C(3) N(2) C(10) C(11) 53.47(16) ? . . . .
C(10) N(2) C(3) C(17) -60.05(17) ? . . . .
C(2) C(1) C(7) C(6) -178.52(14) ? . . . .
C(7) C(1) C(2) O(1) 135.01(16) ? . . . .
C(7) C(1) C(2) N(1) -46.8(2) ? . . . .
C(2) C(1) C(9) C(12) 179.92(14) ? . . . .
C(9) C(1) C(2) O(1) -42.2(2) ? . . . .
C(9) C(1) C(2) N(1) 135.98(15) ? . . . .
C(7) C(1) C(9) C(12) 2.6(2) ? . . . .
C(9) C(1) C(7) C(6) -1.4(2) ? . . . .
N(2) C(3) C(17) C(13) 59.79(17) ? . . . .
C(5) C(4) C(8) O(2) -57.56(18) ? . . . .
C(8) C(4) C(5) N(1) 139.50(13) ? . . . .
C(8) C(4) C(5) C(18) -96.69(17) ? . . . .
C(5) C(4) C(10) N(2) -33.38(15) ? . . . .
C(5) C(4) C(10) C(11) -158.70(14) ? . . . .
C(10) C(4) C(5) N(1) 14.64(15) ? . . . .
C(10) C(4) C(5) C(18) 138.46(15) ? . . . .
C(8) C(4) C(10) N(2) -154.14(13) ? . . . .
C(8) C(4) C(10) C(11) 80.54(19) ? . . . .
C(10) C(4) C(8) O(2) 59.55(19) ? . . . .
C(7) C(6) C(15) C(12) 2.5(2) ? . . . .
C(15) C(6) C(7) C(1) -1.1(2) ? . . . .
C(1) C(9) C(12) C(15) -1.3(2) ? . . . .
N(2) C(10) C(11) C(13) -47.64(17) ? . . . .
N(2) C(10) C(11) C(14) -169.34(13) ? . . . .
N(2) C(10) C(11) C(16) 72.66(15) ? . . . .
C(4) C(10) C(11) C(13) 74.66(18) ? . . . .
C(4) C(10) C(11) C(14) -47.03(19) ? . . . .
C(4) C(10) C(11) C(16) -165.03(14) ? . . . .
C(10) C(11) C(13) C(17) 52.23(19) ? . . . .
C(14) C(11) C(13) C(17) 175.63(15) ? . . . .
C(16) C(11) C(13) C(17) -66.53(18) ? . . . .
C(9) C(12) C(15) C(6) -1.3(2) ? . . . .
C(11) C(13) C(17) C(3) -58.04(19) ? . . . .

loop_
_geom_contact_atom_site_label_1
_geom_contact_atom_site_label_2
_geom_contact_distance
_geom_contact_publ_flag
_geom_contact_site_symmetry_1
_geom_contact_site_symmetry_2
O(1) O(2) 2.7876(18) ? . 2_455
O(1) C(8) 3.557(2) ? . 2_455
O(1) C(10) 3.419(2) ? . 2_455
O(1) C(14) 3.531(2) ? . 2_455
O(2) O(1) 2.7876(18) ? . 2_555
O(2) C(6) 3.452(2) ? . 2_455
C(6) O(2) 3.452(2) ? . 2_555
C(8) O(1) 3.557(2) ? . 2_555
C(10) O(1) 3.419(2) ? . 2_555
C(14) O(1) 3.531(2) ? . 2_555
C(16) C(18) 3.554(2) ? . 1_655
C(18) C(16) 3.554(2) ? . 1_455
O(1) H(8) 3.443 ? . 2_455
O(1) H(10) 2.558 ? . 2_455
O(1) H(15) 2.672 ? . 2_455
O(1) H(20) 2.765 ? . 2_455
O(1) H(26) 1.982 ? . 2_455
O(2) H(5) 2.735 ? . 2_455
O(2) H(6) 3.200 ? . 2_455
O(2) H(11) 3.051 ? . 1_565
O(2) H(23) 3.024 ? . 2_555
C(1) H(22) 3.321 ? . 4_654
C(2) H(20) 3.330 ? . 2_455
C(2) H(26) 3.082 ? . 2_455
C(3) H(7) 3.018 ? . 3_645
C(3) H(8) 3.596 ? . 3_645
C(3) H(11) 3.562 ? . 3_655
C(4) H(1) 3.360 ? . 3_655
C(5) H(6) 3.447 ? . 2_455
C(6) H(7) 3.104 ? . 2_555
C(6) H(11) 3.224 ? . 2_545
C(6) H(12) 3.015 ? . 3_745
C(6) H(16) 3.169 ? . 3_745
C(6) H(19) 3.305 ? . 3_745
C(6) H(22) 2.879 ? . 4_654
C(7) H(4) 3.531 ? . 2_555
C(7) H(7) 3.211 ? . 2_555
C(7) H(22) 3.045 ? . 4_654
C(7) H(24) 3.472 ? . 2_555
C(8) H(1) 3.119 ? . 3_655
C(8) H(2) 3.535 ? . 3_655
C(8) H(5) 3.244 ? . 2_455
C(8) H(6) 3.510 ? . 2_455
C(8) H(11) 2.826 ? . 1_565
C(8) H(22) 3.590 ? . 3_655
C(9) H(2) 3.569 ? . 3_645
C(9) H(13) 3.121 ? . 3_645
C(9) H(17) 3.097 ? . 2_445
C(9) H(22) 3.397 ? . 4_654
C(12) H(2) 3.268 ? . 3_645
C(12) H(5) 3.294 ? . 2_445
C(12) H(7) 3.509 ? . 1_545
C(12) H(8) 3.203 ? . 1_545
C(12) H(12) 3.185 ? . 4_654
C(12) H(17) 3.546 ? . 2_445
C(12) H(22) 3.274 ? . 4_654
C(12) H(25) 3.599 ? . 3_645
C(13) H(5) 3.225 ? . 3_755
C(13) H(9) 3.287 ? . 3_655
C(14) H(5) 3.546 ? . 3_755
C(14) H(18) 3.361 ? . 3_755
C(14) H(21) 3.439 ? . 3_755
C(15) H(8) 3.467 ? . 1_545
C(15) H(9) 3.091 ? . 2_545
C(15) H(11) 3.587 ? . 2_545
C(15) H(12) 3.350 ? . 3_745
C(15) H(12) 3.593 ? . 4_654
C(15) H(19) 3.187 ? . 3_745
C(15) H(22) 3.027 ? . 4_654
C(16) H(4) 3.566 ? . 2_555
C(16) H(23) 3.269 ? . 1_655
C(16) H(24) 3.381 ? . 1_655
C(16) H(25) 3.422 ? . 1_655
C(17) H(7) 3.236 ? . 3_645
C(18) H(6) 3.521 ? . 2_455
C(18) H(19) 3.176 ? . 1_455
C(18) H(20) 3.118 ? . 1_455
C(18) H(26) 3.443 ? . 2_455
H(1) C(4) 3.360 ? . 3_645
H(1) C(8) 3.119 ? . 3_645
H(1) H(3) 2.732 ? . 3_645
H(1) H(7) 2.522 ? . 3_645
H(1) H(8) 3.101 ? . 3_645
H(1) H(24) 3.195 ? . 3_645
H(2) C(8) 3.535 ? . 3_645
H(2) C(9) 3.569 ? . 3_655
H(2) C(12) 3.268 ? . 3_655
H(2) H(7) 2.951 ? . 3_645
H(2) H(8) 3.201 ? . 3_645
H(2) H(9) 3.397 ? . 3_655
H(2) H(11) 2.829 ? . 3_655
H(3) H(1) 2.732 ? . 3_655
H(3) H(9) 3.537 ? . 3_655
H(4) C(7) 3.531 ? . 2_455
H(4) C(16) 3.566 ? . 2_455
H(4) H(6) 2.685 ? . 2_455
H(4) H(10) 3.004 ? . 2_455
H(4) H(18) 3.470 ? . 2_455
H(4) H(20) 2.820 ? . 2_455
H(4) H(23) 3.441 ? . 2_555
H(5) O(2) 2.735 ? . 2_555
H(5) C(8) 3.244 ? . 2_555
H(5) C(12) 3.294 ? . 2_545
H(5) C(13) 3.225 ? . 3_745
H(5) C(14) 3.546 ? . 3_745
H(5) H(7) 2.784 ? . 2_555
H(5) H(9) 3.566 ? . 2_545
H(5) H(11) 2.649 ? . 2_545
H(5) H(12) 2.298 ? . 3_745
H(5) H(13) 3.520 ? . 3_745
H(5) H(16) 2.720 ? . 3_745
H(5) H(19) 3.223 ? . 3_745
H(5) H(22) 3.247 ? . 4_654
H(5) H(26) 3.473 ? . 2_555
H(6) O(2) 3.200 ? . 2_555
H(6) C(5) 3.447 ? . 2_555
H(6) C(8) 3.510 ? . 2_555
H(6) C(18) 3.521 ? . 2_555
H(6) H(4) 2.685 ? . 2_555
H(6) H(7) 2.994 ? . 2_555
H(6) H(16) 3.516 ? . 3_745
H(6) H(22) 3.506 ? . 4_654
H(6) H(23) 3.568 ? . 2_555
H(6) H(24) 3.043 ? . 2_555
H(7) C(3) 3.018 ? . 3_655
H(7) C(6) 3.104 ? . 2_455
H(7) C(7) 3.211 ? . 2_455
H(7) C(12) 3.509 ? . 1_565
H(7) C(17) 3.236 ? . 3_655
H(7) H(1) 2.522 ? . 3_655
H(7) H(2) 2.951 ? . 3_655
H(7) H(5) 2.784 ? . 2_455
H(7) H(6) 2.994 ? . 2_455
H(7) H(11) 2.571 ? . 1_565
H(7) H(22) 2.616 ? . 3_655
H(8) O(1) 3.443 ? . 2_555
H(8) C(3) 3.596 ? . 3_655
H(8) C(12) 3.203 ? . 1_565
H(8) C(15) 3.467 ? . 1_565
H(8) H(1) 3.101 ? . 3_655
H(8) H(2) 3.201 ? . 3_655
H(8) H(11) 2.471 ? . 1_565
H(8) H(17) 3.007 ? . 1_565
H(9) C(13) 3.287 ? . 3_645
H(9) C(15) 3.091 ? . 2_445
H(9) H(2) 3.397 ? . 3_645
H(9) H(3) 3.537 ? . 3_645
H(9) H(5) 3.566 ? . 2_445
H(9) H(12) 3.572 ? . 3_645
H(9) H(13) 2.385 ? . 3_645
H(9) H(17) 2.493 ? . 2_445
H(9) H(22) 3.435 ? . 3_645
H(9) H(26) 3.418 ? . 2_455
H(10) O(1) 2.558 ? . 2_555
H(10) H(4) 3.004 ? . 2_555
H(10) H(23) 2.933 ? . 2_555
H(11) O(2) 3.051 ? . 1_545
H(11) C(3) 3.562 ? . 3_645
H(11) C(6) 3.224 ? . 2_445
H(11) C(8) 2.826 ? . 1_545
H(11) C(15) 3.587 ? . 2_445
H(11) H(2) 2.829 ? . 3_645
H(11) H(5) 2.649 ? . 2_445
H(11) H(7) 2.571 ? . 1_545
H(11) H(8) 2.471 ? . 1_545
H(11) H(12) 3.130 ? . 4_654
H(11) H(13) 3.585 ? . 3_645
H(11) H(17) 3.367 ? . 2_445
H(11) H(22) 3.228 ? . 3_645
H(11) H(26) 3.560 ? . 1_545
H(12) C(6) 3.015 ? . 3_755
H(12) C(12) 3.185 ? . 4_655
H(12) C(15) 3.350 ? . 3_755
H(12) C(15) 3.593 ? . 4_655
H(12) H(5) 2.298 ? . 3_755
H(12) H(9) 3.572 ? . 3_655
H(12) H(11) 3.130 ? . 4_655
H(12) H(17) 2.966 ? . 3_755
H(13) C(9) 3.121 ? . 3_655
H(13) H(5) 3.520 ? . 3_755
H(13) H(9) 2.385 ? . 3_655
H(13) H(11) 3.585 ? . 3_655
H(14) H(18) 3.398 ? . 3_755
H(14) H(25) 3.502 ? . 3_655
H(15) O(1) 2.672 ? . 2_555
H(15) H(17) 3.316 ? . 1_565
H(15) H(18) 3.400 ? . 3_755
H(15) H(21) 3.003 ? . 3_755
H(16) C(6) 3.169 ? . 3_755
H(16) H(5) 2.720 ? . 3_755
H(16) H(6) 3.516 ? . 3_755
H(16) H(18) 2.771 ? . 3_755
H(16) H(21) 2.979 ? . 3_755
H(17) C(9) 3.097 ? . 2_545
H(17) C(12) 3.546 ? . 2_545
H(17) H(8) 3.007 ? . 1_545
H(17) H(9) 2.493 ? . 2_545
H(17) H(11) 3.367 ? . 2_545
H(17) H(12) 2.966 ? . 3_745
H(17) H(15) 3.316 ? . 1_545
H(17) H(19) 2.983 ? . 3_745
H(17) H(22) 3.496 ? . 4_654
H(18) C(14) 3.361 ? . 3_745
H(18) H(4) 3.470 ? . 2_555
H(18) H(14) 3.398 ? . 3_745
H(18) H(15) 3.400 ? . 3_745
H(18) H(16) 2.771 ? . 3_745
H(18) H(23) 3.408 ? . 1_655
H(19) C(6) 3.305 ? . 3_755
H(19) C(15) 3.187 ? . 3_755
H(19) C(18) 3.176 ? . 1_655
H(19) H(5) 3.223 ? . 3_755
H(19) H(17) 2.983 ? . 3_755
H(19) H(23) 3.135 ? . 1_655
H(19) H(24) 3.031 ? . 1_655
H(19) H(25) 2.831 ? . 1_655
H(20) O(1) 2.765 ? . 2_555
H(20) C(2) 3.330 ? . 2_555
H(20) C(18) 3.118 ? . 1_655
H(20) H(4) 2.820 ? . 2_555
H(20) H(23) 2.753 ? . 1_655
H(20) H(24) 2.840 ? . 1_655
H(20) H(25) 3.260 ? . 1_655
H(21) C(14) 3.439 ? . 3_745
H(21) H(15) 3.003 ? . 3_745
H(21) H(16) 2.979 ? . 3_745
H(21) H(24) 3.441 ? . 3_645
H(22) C(1) 3.321 ? . 4_655
H(22) C(6) 2.879 ? . 4_655
H(22) C(7) 3.045 ? . 4_655
H(22) C(8) 3.590 ? . 3_645
H(22) C(9) 3.397 ? . 4_655
H(22) C(12) 3.274 ? . 4_655
H(22) C(15) 3.027 ? . 4_655
H(22) H(5) 3.247 ? . 4_655
H(22) H(6) 3.506 ? . 4_655
H(22) H(7) 2.616 ? . 3_645
H(22) H(9) 3.435 ? . 3_655
H(22) H(11) 3.228 ? . 3_655
H(22) H(17) 3.496 ? . 4_655
H(22) H(24) 3.373 ? . 3_645
H(23) O(2) 3.024 ? . 2_455
H(23) C(16) 3.269 ? . 1_455
H(23) H(4) 3.441 ? . 2_455
H(23) H(6) 3.568 ? . 2_455
H(23) H(10) 2.933 ? . 2_455
H(23) H(18) 3.408 ? . 1_455
H(23) H(19) 3.135 ? . 1_455
H(23) H(20) 2.753 ? . 1_455
H(23) H(26) 2.511 ? . 2_455
H(24) C(7) 3.472 ? . 2_455
H(24) C(16) 3.381 ? . 1_455
H(24) H(1) 3.195 ? . 3_655
H(24) H(6) 3.043 ? . 2_455
H(24) H(19) 3.031 ? . 1_455
H(24) H(20) 2.840 ? . 1_455
H(24) H(21) 3.441 ? . 3_655
H(24) H(22) 3.373 ? . 3_655
H(25) C(12) 3.599 ? . 3_655
H(25) C(16) 3.422 ? . 1_455
H(25) H(14) 3.502 ? . 3_645
H(25) H(19) 2.831 ? . 1_455
H(25) H(20) 3.260 ? . 1_455
H(26) O(1) 1.982 ? . 2_555
H(26) C(2) 3.082 ? . 2_555
H(26) C(18) 3.443 ? . 2_555
H(26) H(5) 3.473 ? . 2_455
H(26) H(9) 3.418 ? . 2_555
H(26) H(11) 3.560 ? . 1_565
H(26) H(23) 2.511 ? . 2_555


#==============================================================================

# Additional structures and associated data_? identifiers
# should be added at this point if there is more than one 
# structure analysis in the CIF.

#==============================================================================

#     End of CIF

#==============================================================================
